# Supplementary material
Source: Springer Nature journal article supplement (https://www.springermedizin.de/resource/supplementary/12958_2010_713_MOESM6_ESM.pdf/9568656)

|       |   |   |   |   |
|-------|---|---|---|---|
| UTP   | - | + | - | + |
| BAPTA | - | - | + | + |

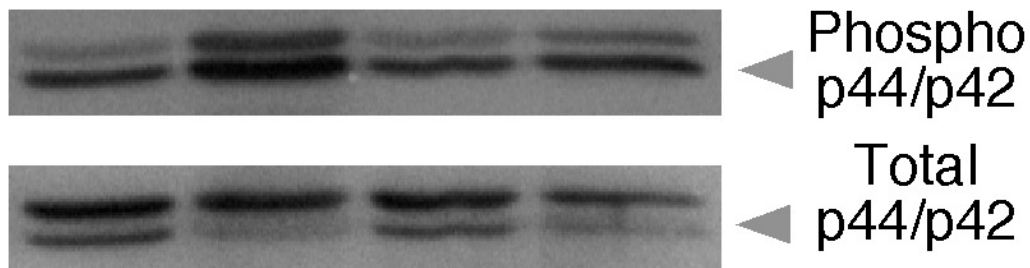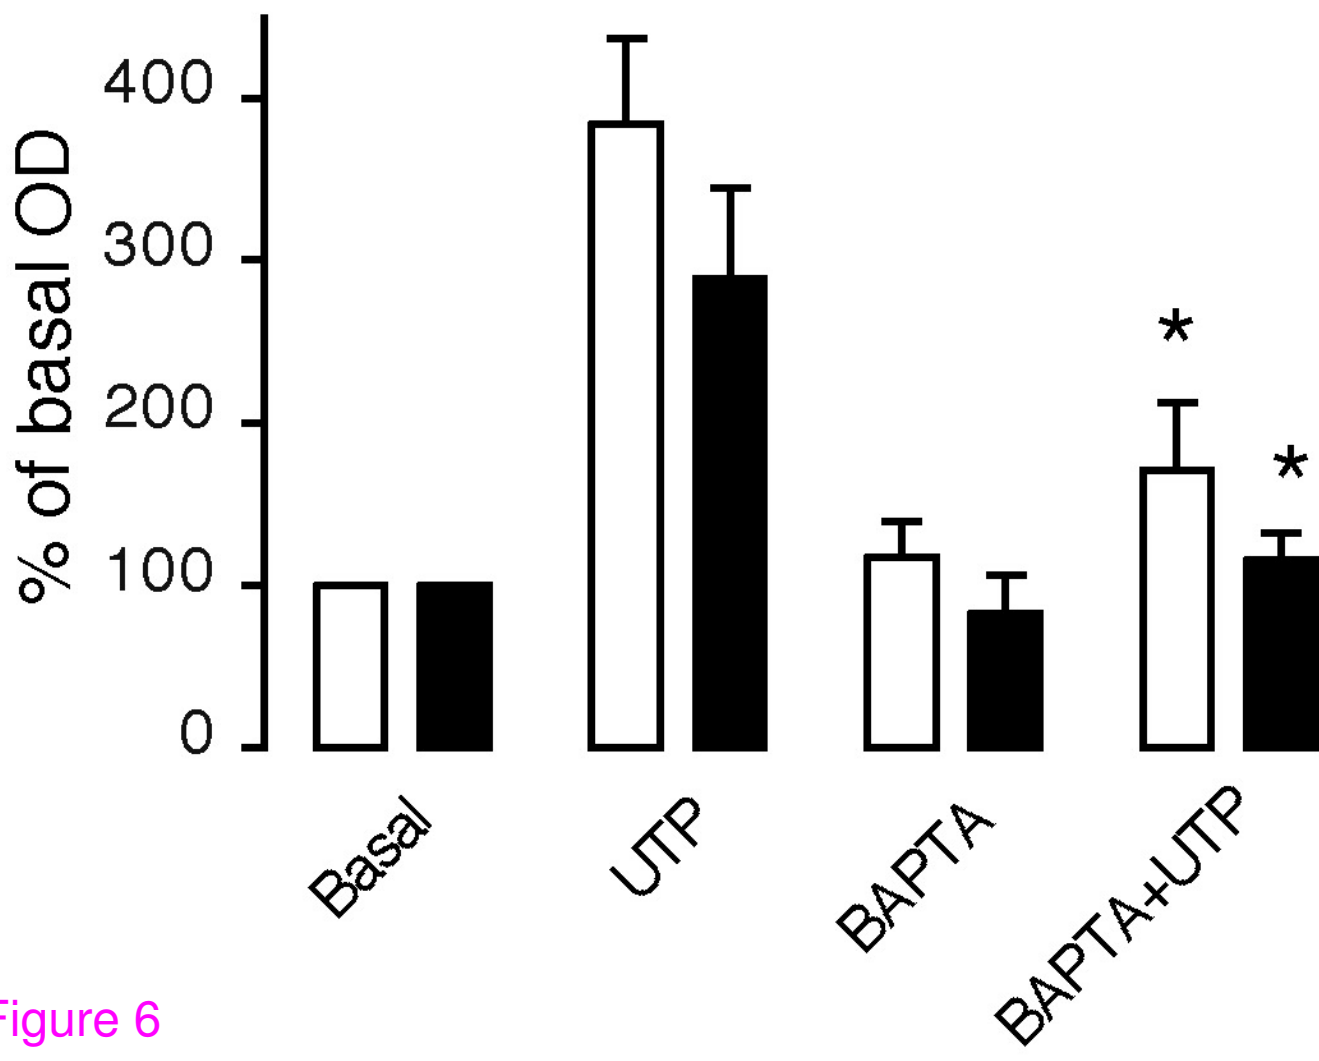

Figure 6

Supplement: MOESM6 [file 9568656]
